# Supplementary material for: The Notorious Harmful Algal Blooms-Forming Dinoflagellate Prorocentrum donghaiense Produces Sexual Resting Cysts, Which Widely Distribute Along the Coastal Marine Sediment of China
Source: Frontiers journal article supplement (doi:10.3389/fmars.2022.826736), 2022-02-28
Supplement: Data_Sheet_3.XLSX [file Data_Sheet_3.XLSX]

## Sheet: Sheet1
China Seas	Sampling stations	Sampling date	Water depth (m)	Longitude (˚)	Latitude (˚)	Cysts/ 32g wet sediment (using qPCR)	Cysts/ 32g wet sediment (using FISH)
East China Sea	ECS1	April 2018	21.3	120.188	26.5082	0	4
	ECS2	April 2018	36.2	120.3	26.4448	0	ND
	ECS3	April 2018	46	120.395	26.3962	0	ND
	ECS4	April 2018	49	120.448	26.315	0	ND
	ECS5	April 2018	61.5	120.544	26.2783	0	ND
	ECS6	April 2018	74.6	120.821	26.1808	0	ND
	ECS7	April 2018	80	121.02	26.0768	0	0
	ECS8	April 2018	13.9	119.874	25.9618	0	2
	ECS9	April 2018	42.6	120.025	25.9295	0	ND
	ECS10	April 2018	44	120.113	25.8722	0	ND
	ECS11	April 2018	52	120.244	25.8248	0	0
	ECS12	April 2018	24.1	120.914	27.3037	0	3
	ECS13	April 2018	36	121.047	27.2103	0	2
	ECS14	April 2018	46	121.181	27.1268	0	ND
	ECS15	April 2018	57	121.326	27.0472	0	ND
	ECS16	April 2018	65.5	121.453	26.9625	0	ND
	ECS17	April 2018	74	121.722	26.7647	0	0
	ECS18	April 2018	20.9	120.476	26.8833	0	1
	ECS19	April 2018	36.6	120.64	26.8055	0	ND
	ECS20	April 2018	48.4	120.807	26.7382	0	ND
	ECS21	April 2018	61.5	120.97	26.6655	0	ND
	ECS22	April 2018	68.1	120.132	26.5915	16.7777	ND
	ECS23	April 2018	77.8	120.423	26.423	0	0
	ECS24	April 2018	8	120.242	26.9256	0	4
	ECS25	April 2018	7.5	120.242	26.9326	0	ND
	ECS26	April 2018	4	120.246	26.9535	0	3
	ECS27	April 2018	4.8	120.266	26.9796	0	ND
	ECS28	April 2018	6	120.31	27.0214	0	ND
	ECS29	April 2018	5	120.263	26.9429	0	2
	ECS30	April 2018	5.5	120.289	26.9557	0	ND
	ECS31	April 2018	6.5	120.316	26.9724	0	ND
	ECS32	April 2018	18	120.271	26.921	0	ND
	ECS33	April 2018	10	120.308	26.9158	0	ND
	ECS34	April 2018	11	120.343	26.9097	0	0
	ECS35	April 2018	12	120.246	26.908	0	1
	ECS36	April 2018	10.5	120.232	26.8805	0	ND
	ECS37	April 2018	10.5	120.218	26.8525	0	ND
	ECS38	January 2018	12	120.185	26.8819	8.92263	8
	ECS39	January 2018	14	120.181	26.8427	0	3
	ECS40	January 2018	17	120.185	26.7815	0	ND
	ECS41	January 2018	17	120.204	26.8884	0	ND
	ECS42	January 2018	24	119.757	26.6739	0	ND
	ECS43	January 2018	25	119.727	26.675	0	0
	ECS44	April 2016	-	120.191	26.9183	0	ND
	ECS45	April 2016	-	120.185	26.893	2.11756	ND
	ECS46	April 2016	-	120.192	26.8427	1	ND
	ECS47	April 2016	-	120.185	26.7815	0	ND
	ECS48	April 2016	-	120.193	26.7494	10.7836	ND
	ECS49	April 2016	-	120.234	26.7056	1.42954	ND
	ECS50	March 2016	-	118.191	24.4714	8.03131	3
	ECS51	March 2016	-	118.189	24.548	1	ND
	ECS52	March 2016	-	118.176	24.5424	36.3007	ND
	ECS53	May 2015	7	122.173	30.7477	1.81468	ND
	ECS54	May 2015	10	122.325	30.7527	4.61386	0
	ECS55	May 2015	12	122.501	30.752	62.3077	ND
	ECS56	May 2015	40	122.672	30.7463	0	3
	ECS57	May 2015	47	123.015	30.72	0	ND
	ECS58	May 2015	48	123.371	30.7633	1	ND
	ECS59	May 2015	36	123.335	31.2737	10.6334	ND
	ECS60	May 2015	31	122.651	31.935	0	0
	ECS61	May 2015	28	122.513	31.7497	0	0
	ECS62	May 2015	33	122.752	31.7643	7.02896	5
	ECS63	May 2015	34	122.959	31.5132	1	ND
	ECS64	May 2015	27	122.702	31.5173	1	ND
	ECS65	May 2015	12	122.427	31.2706	0	ND
	ECS66	May 2015	22	122.527	31.2604	0	ND
	ECS67	May 2015	20	122.67	31.0283	2.20861	5
	ECS68	May 2015	12	122.507	31.0045	1.12615	ND
	ECS69	May 2015	8	122.341	31.0075	0	ND
	ECS70	May 2015	3	122.01	31.0465	0	ND
South China Sea	SCS1	January 2016	8	109.343	18.2875	0	0
	SCS2	January 2016	7	109.333	18.2901	0	ND
	SCS3	January 2016	10	109.328	18.2935	0	ND
	SCS4	February 2016	3	110.341	20.7287	0	ND
	SCS5	February 2016	6	110.35	20.7162	0	ND
	SCS6	February 2016	11	110.368	20.705	0	0
	SCS7	January 2016	7.5	108.576	21.6698	0	ND
	SCS8	January 2016	6.2	108.583	21.6767	0	1
	SCS9	January 2016	6	109.053	21.434	0	ND
	SCS10	January 2016	7	109.048	21.4235	0	ND
	SCS11	January 2016	7	109.044	21.423	0	1
	SCS12	April 2016	15	113.792	22.1323	0	2
	SCS13	April 2016	15	113.805	22.1355	0	ND
	SCS14	April 2016	6.5	113.814	22.1419	0	ND
	SCS15	April 2016	5	113.908	22.4604	0	ND
	SCS16	April 2016	4.5	113.954	22.4944	0	1
	SCS17	April 2016	2.5	113.986	22.5113	0	ND
	SCS18	April 2016	20	114.462	22.5244	0	0
	SCS19	April 2016	18	114.469	22.5379	0	ND
	SCS20	April 2016	16	114.44	22.5504	0	ND
	SCS21	April 2016	4.5	114.533	22.6811	0	0
	SCS22	April 2016	9	114.53	22.6676	0	ND
	SCS23	April 2016	9	114.556	22.6737	0	ND
	SCS24	April 2016	8	117.103	23.4777	0	2
	SCS25	April 2016	7	117.102	23.4764	0	ND
Yellow Sea	YS1	April 2014	4	120.229	36.1583	0	0
	YS2	April 2014	4	120.229	36.1585	0	ND
	YS3	April 2014	4	120.242	36.164	0	ND
	YS4	November 2015	-	120.25	36.1583	0	ND
	YS5	May 2015	-	120.33	36.155	0	ND
	YS6	November 2015	-	120.187	36.1333	0	ND
	YS7	May 2015	-	120.177	36.1044	0	ND
	YS8	May 2015	-	120.25	36.1	0	ND
	YS9	May 2015	-	120.292	36.1	0	ND
	YS10	May 2015	-	120.233	36.0367	0	ND
	YS11	November 2015	-	120.354	36.0025	0	ND
	YS12	November 2015	-	120.425	35.9833	0	ND
	YS13	June 2014	-	120.753	36.3364	0	0
	YS14	June 2014	-	120.812	36.3832	0	ND
	YS15	June 2014	11	120.806	36.4049	0	ND
	YS16	March 2016	12	121.463	37.4824	0	0
	YS17	March 2016	13	121.465	37.4853	0	ND
	YS18	March 2016	9	121.471	37.4899	0	ND
	YS19	November 2015	6	121.681	38.8618	0	0
	YS20	March 2016	10	119.447	34.7818	0	2
	YS21	March 2016	10	119.467	34.7781	0	ND
	YS22	March 2016	11	119.476	34.7902	0	ND
Bohai Sea	BS1	December 2015	9.6	117.917	38.9275	0	0
	BS2	December 2015	10.3	117.939	38.9288	0	ND
	BS3	December 2015	11.9	117.97	38.9386	0	ND
	BS4	May 2014	12	119.575	39.6336	0	0
	BS5	May 2014	11	119.64	39.8525	0	ND
	BS6	May 2014	15	119.732	39.7989	0	ND
	BS7	May 2014	17	119.789	39.7289	0	ND
	BS8	May 2014	25	119.913	39.6019	0	ND
